# Supplementary material
Source: MDPI journal article supplement (https://www.mdpi.com/1999-4907/8/1/8)
Supplement: s1 [file s1]

Supplementary Materials: Effects of Repeated Growing Season Prescribed Fire on the Structure and Composition of Pine–Hardwood Forests in the Southeastern Piedmont, USA

Matthew J. Reilly, Kenneth Outcalt, Joseph J. O’Brien and Dale Wade

**Figure S1.** Differences among blocks in the effects of repeated growing season prescribed fire on (**a**) basal area, (**b**) density, and (**c**) block quadratic mean diameter of overstory trees (>11.7 cm dbh) in mixed pine–hardwood forests of the Piedmont National Wildlife Refuge near Macon, Georgia, USA.
